# Supplementary material for: Characterizing highly oxygenated organic molecules in limonene secondary organic aerosols: roles of temperature and relative humidity
Source: Royal Society of Chemistry journal article supplement (doi:10.1039/d4ea00153b), 2025-01-01

## Supplementary Information

### **Characterizing highly oxygenated organic molecules in limonene secondary organic aerosol: roles of temperature and relative humidity**

Yitong Zhai<sup>a\*</sup>, Vasilios G. Samaras<sup>b\*</sup>, S. Mani Sarathy<sup>a</sup>

<sup>1</sup>Clean Energy Research Platform, Physical Sciences and Engineering Division, King Abdullah University of Science and Technology, Thuwal, Saudi Arabia

<sup>2</sup>Analytical Chemistry Core Lab, King Abdullah University of Science and Technology (KAUST), Thuwal, 23955-6900, Saudi Arabia

\*Corresponding Author:

Yitong Zhai (Yitong.zhai@kaust.edu.sa)

Vasilios G. Samaras (vasileios.samaras@kaust.edu.sa)

The SI includes: 2 figures and 2 tables.

**Table S1.** The twenty most abundant HOM products from the ozonolysis of limonene at T = 25°C and 5°C as well as RH = 15% and 75%. Note that all compounds are detected as clusters with Na<sup>+</sup> adducts.

| T = 25°C                                        |          | T = 5°C                                         |          | RH = 15%                                        |          | RH = 75%                                        |          |
|-------------------------------------------------|----------|-------------------------------------------------|----------|-------------------------------------------------|----------|-------------------------------------------------|----------|
| Formula                                         | m/z      | Formula                                         | m/z      | Formula                                         | m/z      | Formula                                         | m/z      |
| C <sub>20</sub> H <sub>34</sub> O <sub>8</sub>  | 425.2146 | C <sub>20</sub> H <sub>34</sub> O <sub>8</sub>  | 425.2146 | C <sub>19</sub> H <sub>30</sub> O <sub>9</sub>  | 425.1781 | C <sub>19</sub> H <sub>32</sub> O <sub>9</sub>  | 427.1937 |
| C <sub>10</sub> H <sub>16</sub> O <sub>6</sub>  | 255.0839 | C <sub>20</sub> H <sub>34</sub> O <sub>9</sub>  | 441.2095 | C <sub>19</sub> H <sub>32</sub> O <sub>8</sub>  | 411.1988 | C <sub>19</sub> H <sub>32</sub> O <sub>8</sub>  | 411.1988 |
| C <sub>19</sub> H <sub>32</sub> O <sub>8</sub>  | 411.1989 | C <sub>19</sub> H <sub>32</sub> O <sub>8</sub>  | 411.1989 | C <sub>19</sub> H <sub>30</sub> O <sub>8</sub>  | 409.1832 | C <sub>20</sub> H <sub>34</sub> O <sub>8</sub>  | 425.2145 |
| C <sub>19</sub> H <sub>30</sub> O <sub>8</sub>  | 409.1833 | C <sub>19</sub> H <sub>30</sub> O <sub>8</sub>  | 409.1833 | C <sub>19</sub> H <sub>32</sub> O <sub>9</sub>  | 427.1937 | C <sub>19</sub> H <sub>30</sub> O <sub>9</sub>  | 425.1781 |
| C <sub>20</sub> H <sub>34</sub> O <sub>9</sub>  | 441.2095 | C <sub>10</sub> H <sub>16</sub> O <sub>6</sub>  | 255.0839 | C <sub>19</sub> H <sub>30</sub> O <sub>10</sub> | 441.1730 | C <sub>18</sub> H <sub>30</sub> O <sub>9</sub>  | 413.1781 |
| C <sub>19</sub> H <sub>30</sub> O <sub>9</sub>  | 425.1782 | C <sub>20</sub> H <sub>34</sub> O <sub>7</sub>  | 409.2196 | C <sub>10</sub> H <sub>16</sub> O <sub>6</sub>  | 255.0838 | C <sub>20</sub> H <sub>34</sub> O <sub>9</sub>  | 441.2094 |
| C <sub>20</sub> H <sub>32</sub> O <sub>9</sub>  | 439.1938 | C <sub>19</sub> H <sub>30</sub> O <sub>9</sub>  | 425.1782 | C <sub>19</sub> H <sub>32</sub> O <sub>7</sub>  | 395.2039 | C <sub>19</sub> H <sub>30</sub> O <sub>8</sub>  | 409.1832 |
| C <sub>19</sub> H <sub>32</sub> O <sub>7</sub>  | 395.2040 | C <sub>19</sub> H <sub>32</sub> O <sub>9</sub>  | 427.1938 | C <sub>19</sub> H <sub>30</sub> O <sub>7</sub>  | 393.1883 | C <sub>19</sub> H <sub>32</sub> O <sub>10</sub> | 443.1886 |
| C <sub>20</sub> H <sub>34</sub> O <sub>10</sub> | 457.2044 | C <sub>20</sub> H <sub>32</sub> O <sub>9</sub>  | 439.1938 | C <sub>19</sub> H <sub>32</sub> O <sub>10</sub> | 443.1886 | C <sub>19</sub> H <sub>30</sub> O <sub>10</sub> | 441.1730 |
| C <sub>10</sub> H <sub>18</sub> O <sub>6</sub>  | 257.0995 | C <sub>19</sub> H <sub>32</sub> O <sub>7</sub>  | 395.204  | C <sub>18</sub> H <sub>30</sub> O <sub>8</sub>  | 397.1831 | C <sub>19</sub> H <sub>32</sub> O <sub>7</sub>  | 395.2039 |
| C <sub>20</sub> H <sub>32</sub> O <sub>8</sub>  | 423.1989 | C <sub>20</sub> H <sub>32</sub> O <sub>8</sub>  | 423.1989 | C <sub>18</sub> H <sub>28</sub> O <sub>9</sub>  | 411.1624 | C <sub>20</sub> H <sub>34</sub> O <sub>7</sub>  | 409.2196 |
| C <sub>20</sub> H <sub>32</sub> O <sub>10</sub> | 455.1887 | C <sub>20</sub> H <sub>34</sub> O <sub>10</sub> | 457.2044 | C <sub>18</sub> H <sub>28</sub> O <sub>8</sub>  | 395.1674 | C <sub>19</sub> H <sub>32</sub> O <sub>9</sub>  | 439.1938 |
| C <sub>20</sub> H <sub>34</sub> O <sub>7</sub>  | 409.2196 | C <sub>20</sub> H <sub>32</sub> O <sub>10</sub> | 455.1887 | C <sub>19</sub> H <sub>30</sub> O <sub>11</sub> | 457.1679 | C <sub>18</sub> H <sub>30</sub> O <sub>8</sub>  | 397.1833 |
| C <sub>19</sub> H <sub>32</sub> O <sub>10</sub> | 443.1887 | C <sub>19</sub> H <sub>30</sub> O <sub>7</sub>  | 393.1884 | C <sub>18</sub> H <sub>30</sub> O <sub>9</sub>  | 413.1781 | C <sub>20</sub> H <sub>32</sub> O <sub>10</sub> | 455.1888 |
| C <sub>19</sub> H <sub>30</sub> O <sub>7</sub>  | 393.1884 | C <sub>20</sub> H <sub>32</sub> O <sub>7</sub>  | 407.2040 | C <sub>18</sub> H <sub>28</sub> O <sub>10</sub> | 427.1573 | C <sub>18</sub> H <sub>28</sub> O <sub>9</sub>  | 411.1624 |
| C <sub>19</sub> H <sub>30</sub> O <sub>10</sub> | 441.1731 | C <sub>19</sub> H <sub>30</sub> O <sub>10</sub> | 441.1731 | C <sub>18</sub> H <sub>30</sub> O <sub>7</sub>  | 381.1883 | C <sub>18</sub> H <sub>30</sub> O <sub>10</sub> | 429.1730 |
| C <sub>18</sub> H <sub>30</sub> O <sub>8</sub>  | 397.1833 | C <sub>19</sub> H <sub>32</sub> O <sub>10</sub> | 443.1887 | C <sub>18</sub> H <sub>30</sub> O <sub>10</sub> | 429.1730 | C <sub>10</sub> H <sub>16</sub> O <sub>6</sub>  | 255.0839 |
| C <sub>18</sub> H <sub>30</sub> O <sub>9</sub>  | 413.1782 | C <sub>20</sub> H <sub>34</sub> O <sub>11</sub> | 473.1993 | C <sub>18</sub> H <sub>28</sub> O <sub>7</sub>  | 379.1726 | C <sub>20</sub> H <sub>34</sub> O <sub>10</sub> | 457.2044 |
| C <sub>20</sub> H <sub>32</sub> O <sub>7</sub>  | 407.204  | C <sub>18</sub> H <sub>30</sub> O <sub>8</sub>  | 397.1833 | C <sub>19</sub> H <sub>30</sub> O <sub>6</sub>  | 377.1933 | C <sub>18</sub> H <sub>30</sub> O <sub>7</sub>  | 381.1883 |
| C <sub>20</sub> H <sub>34</sub> O <sub>11</sub> | 473.1993 | C <sub>19</sub> H <sub>30</sub> O <sub>11</sub> | 457.1680 | C <sub>19</sub> H <sub>32</sub> O <sub>11</sub> | 459.1836 | C <sub>20</sub> H <sub>32</sub> O <sub>10</sub> | 455.1887 |

**Table S2.** Singlal intensity in each volatility class in the ozonolysis of lomonene at T = 25°C and 5°C as well as RH = 15% and 75%. Note that “-” in the table means no monomer is classified into ELOVC or ULVOC.

|                               | SVOC    | LVOC    | ELVOC   | ULVOC   |
|-------------------------------|---------|---------|---------|---------|
| <b>Temperature conditions</b> |         |         |         |         |
| T = 5°C                       |         |         |         |         |
| Monomer                       | 1.03E10 | 1.58E09 | -       | -       |
| Dimer                         | 4.20E09 | 7.02E10 | 2.66E10 | 9.33E08 |
| T = 25°C                      |         |         |         |         |
| Monomer                       | 1.18E10 | 4.81E09 | -       | -       |
| Dimer                         | 4.90E09 | 5.94E10 | 2.38E10 | 2.38E08 |
| <b>RH conditions</b>          |         |         |         |         |
| RH = 15%                      |         |         |         |         |
| Monomer                       | 4.06E10 | 9.47E08 | -       | -       |
| Dimer                         | 6.90E09 | 4.28E11 | 1.67E11 | 1.17E09 |
| RH = 75%                      |         |         |         |         |
| Monomer                       | 3.84E10 | 8.66E08 | -       | -       |
| Dimer                         | 6.20E09 | 4.96E11 | 1.92E11 | 1.13E09 |

**Figure S1.** The (a) formula number and (b) intensity molecular weight distributions ;imonene SOA at T = 25°C and 5°C and RH = 15% and 75%.

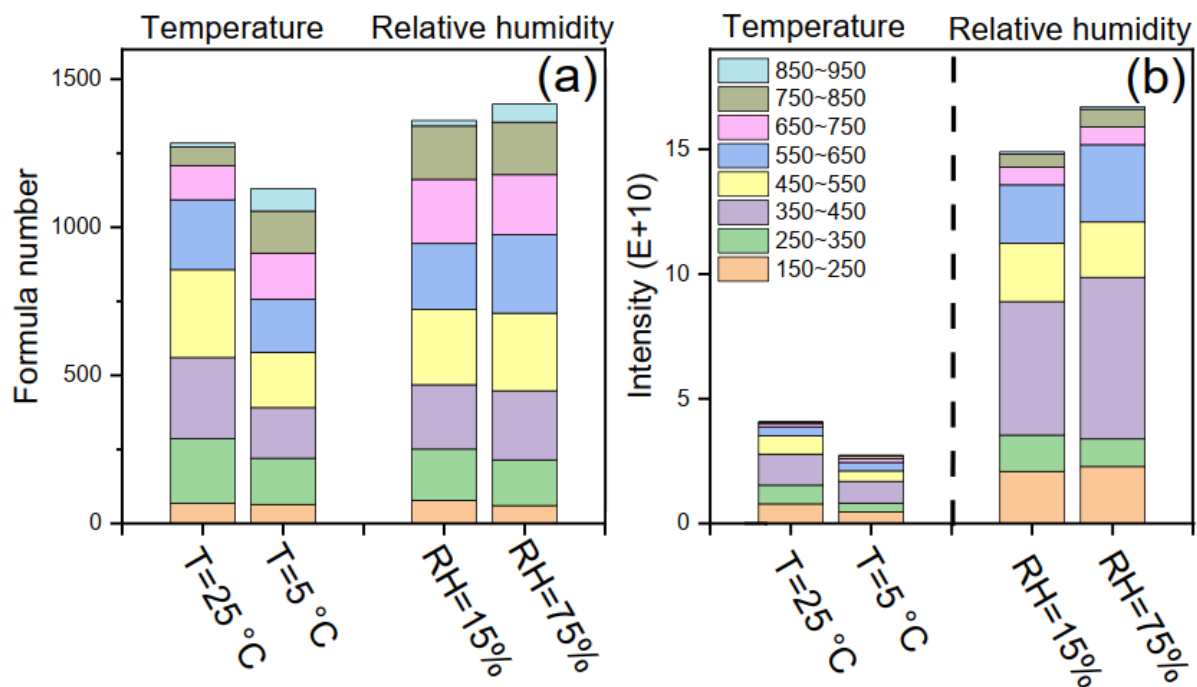

**Figure S2.** Potential reaction pathways to form the larger molecules through (a) hydroperoxide + carbonyl channels, (b) alcohol + carbonyl, and (c) peroxydicarboxylic acid + carbonyl channels.

(a) hydroperoxide + carbonyl

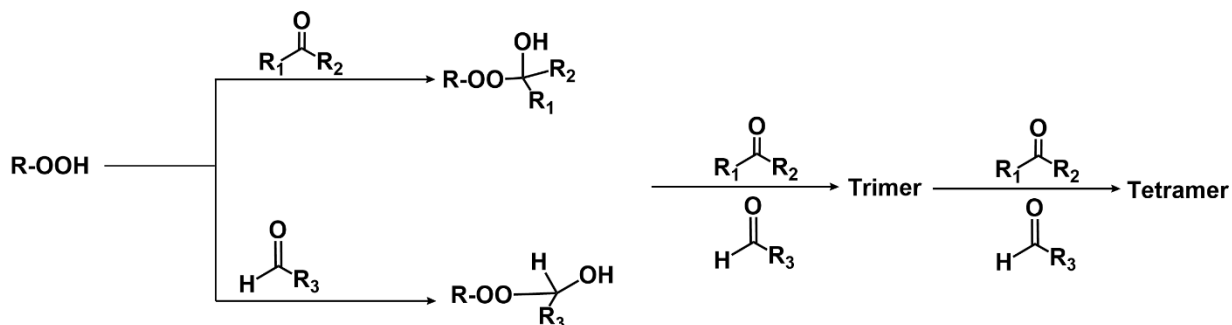

(b) alcohol + carbonyl

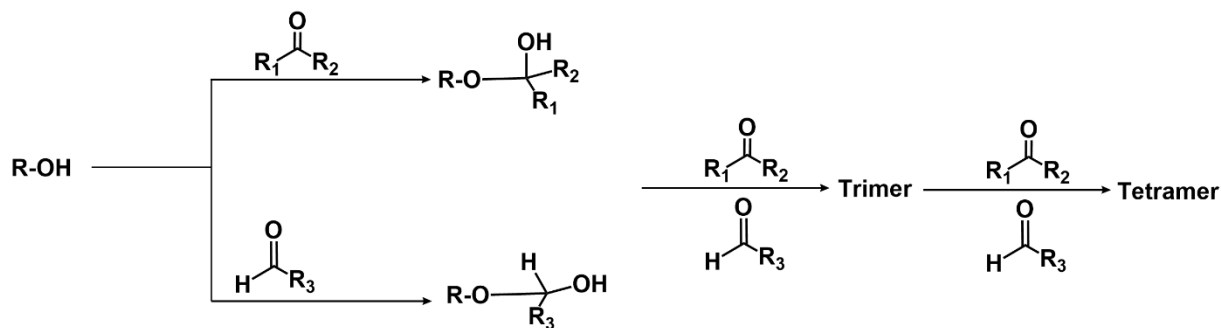

(c) peroxydicarboxylic acid + carbonyl

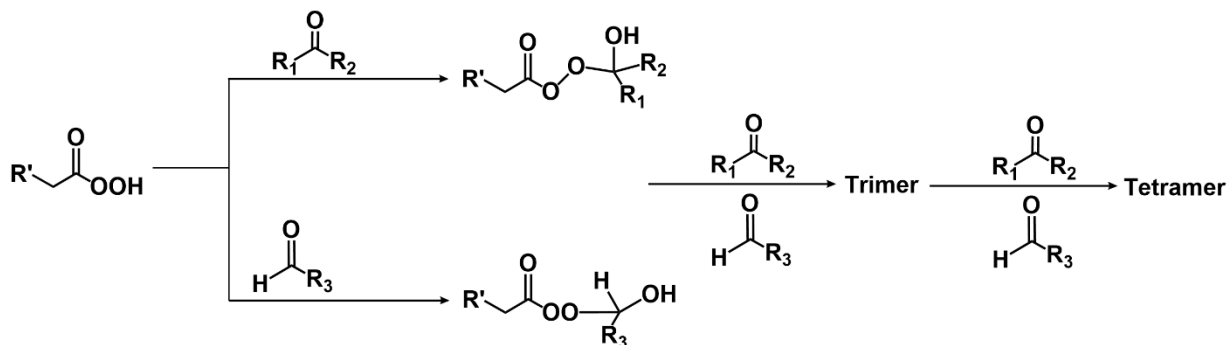

Supplement: d4ea00153b1.pdf [file d4ea00153b1.pdf]
